# Supplementary material
Source: PubMed Central journal article supplement (PMC3911037)
Supplement: AEM.03478-13_zam999105128so1.pdf [file AEM.03478-13_zam999105128so1.pdf]

**Table S1.** Nucleotide sequences of PCR assays used in this study

| Assay                                 | Primer/Probe Sequences (5'-3')                        | Final concentration |
|---------------------------------------|-------------------------------------------------------|---------------------|
| <i>B. anthracis</i> PCR<br>(pX01-MGB) | F: CATTAAAGTTTTGGCCTGTATAGTCAA                        | 900 µM              |
|                                       | R: GGATTTGCAGAAGGAATGGAAA                             | 300 µM              |
|                                       | Pr: [FAM] CTGCCACCCTTCG [MGB] <sup>a</sup>            | 200 µM              |
| <i>B. subtilis</i> PCR<br>(Bsub2)     | F: TCA AAG CAA AAA AAC GGA CAA                        | 200 µM              |
|                                       | R: GAA TCA GTC ATT TCC CTT GAT AAG TAC                | 200 µM              |
|                                       | Pr: [TET]- CAG TAG CTT TTC CGC GTC AAA TCG CC -[BHQ2] | 200 µM              |

<sup>a</sup> Reporter dyes are listed in parentheses. FAM = fluorescein; MGB = minor groove binder; BHQ2 = black hole quencher 2

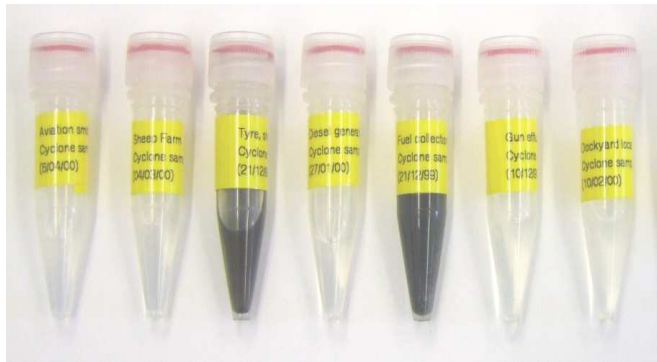

**Figure S1.** Buffer samples collected from a HWWC situated in seven different environmental scenarios. From left: Airfield; Sheep Farm; Burning Combustibles; Diesel Generator; Burning Fuel; Firing Range; Dockyard.
